# Supplementary material for: Efficacy and Safety of Vedolizumab in Ulcerative Colitis and Crohn’s Disease Patients Stratified by Age
Source: PubMed Central journal article supplement — Adv Ther. 2017 Jan 9;34(2):542–59. doi: 10.1007/s12325-016-0467-6 (PMC5331094; doi:10.1007/s12325-016-0467-6), 2017-01-09
Supplement: 12325_2016_467_MOESM1_ESM.pdf [file 12325_2016_467_MOESM1_ESM.pdf]

## Supporting Information

Additional Supporting Information may be found in the online version of this article:

**Table S1:** Primary outcome measures in patients with UC aged <65 years and ≥65 years

**Table S2:** Primary outcome measures in patients with CD aged <65 years and ≥65 years

**Table S3:** Mean change from baseline CRP levels at week 6 in CD induction ITT patients

**Table S4:** Common adverse events in patients aged <65 years and ≥65 years

**Table S5:** Adverse hematological events in patients with UC and CD

**Table S6:** Deaths reported in patients with UC and CD

**Figure S1:** Disposition of UC and CD patients in the GEMINI studies

**Figure S2:** Secondary endpoints in the UC induction phase

**Figure S3:** Secondary endpoints in the UC maintenance phase

**Figure S4:** Secondary endpoints in the CD maintenance phase

**Table S1. Primary outcome measures in patients with UC aged <65 years and ≥65 years**

| Outcome                         | Age       | Patients, n/N (%)            |                                    |                                    | % -Point difference from PBO (95% CI) |                            |
|---------------------------------|-----------|------------------------------|------------------------------------|------------------------------------|---------------------------------------|----------------------------|
|                                 |           | PBO (n=149)                  | VDZ (n=225)                        |                                    | VDZ                                   |                            |
| Clinical response <sup>a</sup>  | <65 years | 37/142 (26)                  | 103/217 (48)                       |                                    | 21.4 (11.6, 31.2)                     |                            |
|                                 | ≥65 years | 1/7 (14)                     | 3/8 (38)                           |                                    | 23.2 (-26.3, 67.5)                    |                            |
| Week 52                         |           | VDZ/PBO <sup>b</sup> (n=126) | VDZ/VDZ (Q8W) <sup>c</sup> (n=122) | VDZ/VDZ (Q4W) <sup>d</sup> (n=125) | VDZ/VDZ (Q8W) <sup>c</sup>            | VDZ/VDZ (Q4W) <sup>d</sup> |
| Clinical remission <sup>e</sup> | <65 years | 19/121 (16)                  | 50/117 (43)                        | 54/119 (45)                        | 27.0 (16.0, 38.1)                     | 29.7 (18.6, 40.7)          |
|                                 | ≥65 years | 1/5 (20)                     | 1/5 (20)                           | 2/6 (33)                           | 0.0 (-62.6, 62.6)                     | 13.3 (-45.1, 66.7)         |

CI, confidence interval; PBO, placebo; Q4W, every 4 weeks; Q8W, every 8 weeks; UC, ulcerative colitis; VDZ, vedolizumab.

<sup>a</sup>Defined as reduction in complete Mayo score of ≥3 points and ≥30% from baseline with an accompanying decrease in rectal bleeding subscore of ≥1 point or absolute rectal bleeding subscore of ≤1 point.

<sup>b</sup>Patients received VDZ during induction and PBO during maintenance.

<sup>c</sup>Patients received VDZ during induction and VDZ Q8W during maintenance.

<sup>d</sup>Patients received VDZ during induction and VDZ Q4W during maintenance.

<sup>e</sup>Defined as complete Mayo score of ≤2 points and no individual subscore >1 point.

**Table S2. Primary outcome measures in patients with CD aged <65 years and ≥65 years**

| <b>Outcome</b>                          | <b>Age</b> | <b>Patients, n/N (%)</b>           |                                          |                                          | <b>%-Point difference from PBO (95% CI)</b> |                                  |
|-----------------------------------------|------------|------------------------------------|------------------------------------------|------------------------------------------|---------------------------------------------|----------------------------------|
| <b>Week 6</b>                           |            | <b>PBO (n=148)</b>                 | <b>VDZ (n=220)</b>                       |                                          | <b>VDZ</b>                                  |                                  |
| Clinical remission <sup>a</sup>         | <65 years  | 9/142 (6)                          | 31/218 (14)                              |                                          | 7.9 (1.8, 14.0)                             |                                  |
|                                         | ≥65 years  | 1/6 (17)                           | 1/2 (50)                                 |                                          | 33.3 (-53.4, 90.6)                          |                                  |
| Enhanced clinical response <sup>b</sup> | <65 years  | 37/142 (26)                        | 68/218 (31)                              |                                          | 5.1 (-4.3, 14.6)                            |                                  |
|                                         | ≥65 years  | 1/6 (17)                           | 1/2 (50)                                 |                                          | 33.3 (-53.4, 90.6)                          |                                  |
| <b>Week 52</b>                          |            | <b>VDZ/PBO<sup>c</sup> (n=153)</b> | <b>VDZ/VDZ (Q8W)<sup>d</sup> (n=154)</b> | <b>VDZ/VDZ (Q4W)<sup>e</sup> (n=154)</b> | <b>VDZ/VDZ (Q8W)<sup>d</sup></b>            | <b>VDZ/VDZ (Q4W)<sup>e</sup></b> |
| Clinical remission <sup>a</sup>         | <65 years  | 30/149 (20)                        | 58/151 (38)                              | 56/152 (37)                              | 18.3 (8.2, 28.4)                            | 16.7 (6.7, 26.7)                 |
|                                         | ≥65 years  | 3/4 (75)                           | 2/3 (67)                                 | 0/2 (0)                                  | -8.3 (-75.5, 63.4)                          | -75.0 (-99.4, 22.9)              |

CD, Crohn's disease; CDAI, Crohn's Disease Activity Index; CI, confidence interval; PBO, placebo; Q4W, every 4 weeks; Q8W, every 8 weeks; VDZ, vedolizumab.

<sup>a</sup>Defined as CDAI score ≤150.

<sup>b</sup>Defined as a ≥100-point reduction in CDAI score from baseline.

<sup>c</sup>Patients received VDZ during induction and PBO during maintenance.

<sup>d</sup>Patients received VDZ during induction and VDZ Q8W during maintenance.

<sup>e</sup>Patients received VDZ during induction and VDZ Q4W during maintenance.

**Table S3.** Mean change from baseline CRP levels at week 6 in CD induction ITT patients

|                                                | Age <35 years   |                  | Age 35 to <55 years |                 | Age ≥55 years                |                 |
|------------------------------------------------|-----------------|------------------|---------------------|-----------------|------------------------------|-----------------|
|                                                | PBO<br>(n = 67) | VDZ<br>(n = 111) | PBO<br>(n = 63)     | VDZ<br>(n = 96) | PBO <sup>a</sup><br>(n = 18) | VDZ<br>(n = 13) |
| Patients with CRP data, n                      | 67              | 111              | 62                  | 96              | 18                           | 13              |
| Mean change from baseline serum CRP, mg/L (SD) | -3.2<br>(33.9)  | -3.0<br>(15.8)   | -2.2<br>(27.2)      | -2.7<br>(17.7)  | -10.3<br>(24.0)              | -4.3<br>(7.8)   |

CD, Crohn's disease; CRP, C-reactive protein; ITT, intent-to-treat; PBO, placebo; SD, standard deviation; VDZ, vedolizumab.

**Table S4. Adverse events by age <65 years and ≥65 years**

| Adverse event <sup>a</sup> | Patients, n (%)                   |                                    |                                  |                                  |
|----------------------------|-----------------------------------|------------------------------------|----------------------------------|----------------------------------|
|                            | Age <65 years                     |                                    | Age ≥65 years                    |                                  |
|                            | PBO/PBO <sup>b</sup><br>(n = 284) | VDZ/VDZ <sup>c</sup><br>(n = 1400) | PBO/PBO <sup>b</sup><br>(n = 13) | VDZ/VDZ <sup>c</sup><br>(n = 34) |
| Nasopharyngitis            | 19 (7)                            | 177 (13)                           | 2 (15)                           | 3 (9)                            |
| Headache                   | 28 (10)                           | 171 (12)                           | 4 (31)                           | 6 (18)                           |
| Crohn's disease            | 33 (12)                           | 161 (12)                           | 3 (23)                           | 3 (9)                            |
| Arthralgia                 | 26 (9)                            | 158 (11)                           | 3 (23)                           | 8 (24)                           |
| Pyrexia                    | 21 (7)                            | 127 (9)                            | 1 (8)                            | 0                                |
| Nausea                     | 22 (8)                            | 126 (9)                            | 1 (8)                            | 2 (6)                            |
| Dizziness                  | 7 (2)                             | 45 (3)                             | 1 (8)                            | 3 (9)                            |
| Edema peripheral           | 9 (3)                             | 35 (3)                             | 3 (23)                           | 3 (9)                            |

PBO, placebo; VDZ, vedolizumab.

<sup>a</sup>Only adverse events occurring in ≥9% of vedolizumab-treated patients in any group are listed.

<sup>b</sup>Patients received PBO during induction and maintenance periods.

<sup>c</sup>Patients received VDZ during induction and maintenance periods.

**Table S5.** Adverse hematological events in patients with UC and CD

| Adverse hematological event <sup>a</sup> | Patients, n (%)                   |                                   |                                   |                                   |                                  |                                   |
|------------------------------------------|-----------------------------------|-----------------------------------|-----------------------------------|-----------------------------------|----------------------------------|-----------------------------------|
|                                          | Age <35 years                     |                                   | Age 35 to <55 years               |                                   | Age ≥55 years                    |                                   |
|                                          | PBO/PBO <sup>b</sup><br>(n = 120) | VDZ/VDZ <sup>c</sup><br>(n = 688) | PBO/PBO <sup>b</sup><br>(n = 141) | VDZ/VDZ <sup>c</sup><br>(n = 599) | PBO/PBO <sup>b</sup><br>(n = 36) | VDZ/VDZ <sup>c</sup><br>(n = 147) |
| <b>Any hematological AE</b>              | <b>6 (5)</b>                      | <b>28 (4)</b>                     | <b>4 (3)</b>                      | <b>16 (3)</b>                     | <b>0</b>                         | <b>3 (2)</b>                      |
| Lymphopenia                              | 4 (3)                             | 14 (2)                            | 2 (1)                             | 11 (2)                            | 0                                | 1 (<1)                            |
| Lymphocyte count decreased               | 2 (2)                             | 7 (1)                             | 0                                 | 3 (<1)                            | 0                                | 1 (<1)                            |
| Leukopenia                               | 0                                 | 4 (<1)                            | 0                                 | 1 (<1)                            | 0                                | 1 (<1)                            |
| Monocytopenia                            | 0                                 | 1 (<1)                            | 0                                 | 0                                 | 0                                | 0                                 |
| Neutropenia                              | 0                                 | 1 (<1)                            | 0                                 | 0                                 | 0                                | 0                                 |
| Febrile neutropenia                      | 0                                 | 1 (<1)                            | 0                                 | 0                                 | 0                                | 0                                 |
| Thrombocytopenia                         | 0                                 | 1 (<1)                            | 0                                 | 0                                 | 0                                | 0                                 |
| White blood cell count decreased         | 1 (<1)                            | 2 (<1)                            | 0                                 | 2 (<1)                            | 0                                | 0                                 |
| Cyclic neutropenia                       | 0                                 | 0                                 | 0                                 | 0                                 | 0                                | 0                                 |
| Neutrophil count decreased               | 1 (<1)                            | 0                                 | 2 (1)                             | 1 (<1)                            | 0                                | 0                                 |

AE, adverse event; CD, Crohn's disease; PBO, placebo; UC, ulcerative colitis; VDZ, vedolizumab.

<sup>a</sup>Ranked from highest to lowest incidence in patients aged <35 years who were treated with VDZ.

<sup>b</sup>Patients received PBO during induction and maintenance periods.

<sup>c</sup>Patients received VDZ during induction and maintenance periods.

**Table S6.** Deaths reported in patients with UC and CD

| Age             | No. of events | Age/ Sex | Indications | Cause of death (preferred term <sup>a</sup> ) | Treatment group (induction/ maintenance) | No. of VDZ doses |
|-----------------|---------------|----------|-------------|-----------------------------------------------|------------------------------------------|------------------|
| <35 years       | 3             | 23/M     | CD          | Myocarditis                                   | VDZ/VDZ (Q4W)                            | 2                |
|                 |               | 28/M     | CD          | CD, sepsis                                    | VDZ/VDZ (Q8W)                            | 8                |
|                 |               | 30/M     | CD          | Septic shock                                  | VDZ/VDZ (Q4W)                            | 4                |
| 35 to <55 years | 1             | 46/F     | CD          | Intentional overdose                          | VDZ/VDZ (Q4W)                            | 5                |
| ≥55 years       | 2             | 66/M     | UC          | Arteriosclerosis coronary artery              | Cohort 2 VDZ (induction only)            | 1                |
|                 |               | 75/M     | CD          | Bronchopneumonia                              | PBO/PBO                                  | 0                |

CD, Crohn's disease; ITT, intent-to-treat; PBO, placebo; Q4W, every 4 weeks; Q8W, every 8 weeks; UC, ulcerative colitis; VDZ, vedolizumab.

<sup>a</sup>Medical Dictionary for Regulatory Activities preferred term.





Vedolizumab in patients with advancing age and UC or CD

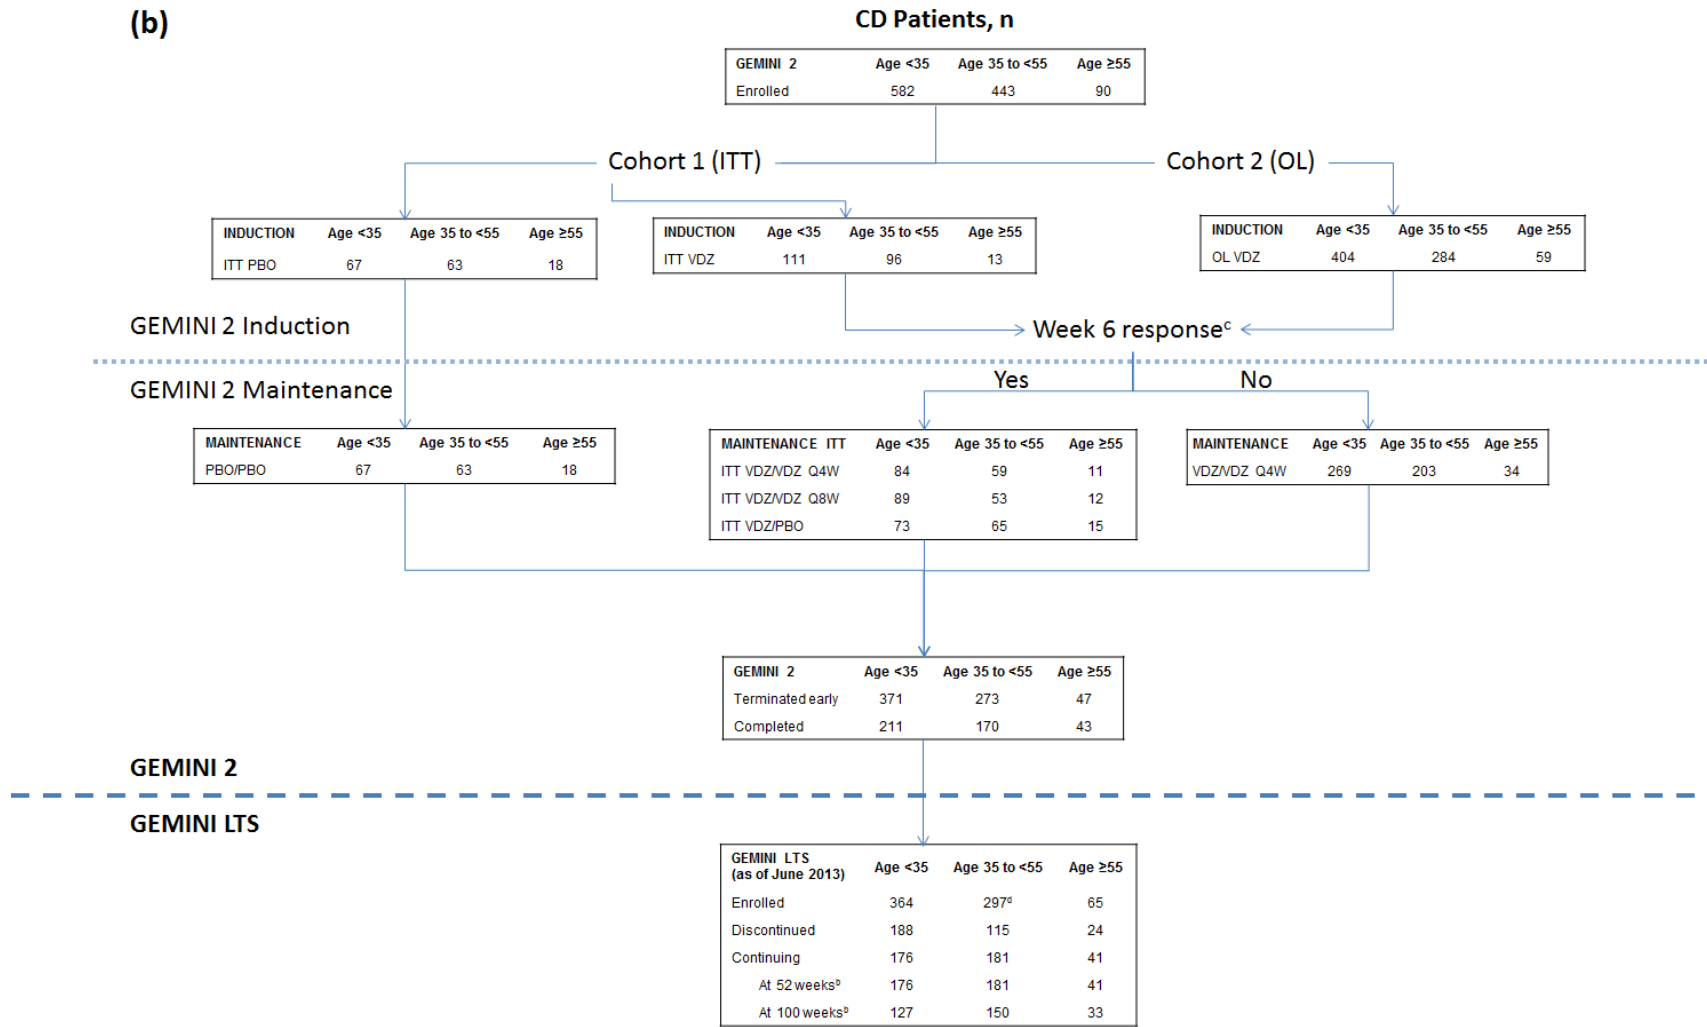

**Figure S1.** Disposition of UC and CD patients in the GEMINI studies. Patients were randomized for **(A)** GEMINI 1 and **(B)** GEMINI 2 induction therapy to receive intravenous vedolizumab (300 mg, ITT VDZ) or placebo (ITT PBO). An additional

Vedolizumab in patients with advancing age and UC or CD

group of patients were enrolled in the open-label vedolizumab (300 mg) treatment group (OL VDZ). Patients who demonstrated clinical response to vedolizumab at week 6 were randomly assigned to receive vedolizumab (300 mg) every 4 weeks (ITT VDZ/VDZ Q4W) or every 8 weeks (ITT VDZ/VDZ Q8W) or placebo (ITT VDZ/PBO) for up to 52 weeks beginning from week 6. Patients who did not achieve a clinical response at week 6 received vedolizumab (300 mg) every 4 weeks (VDZ/VDZ Q4W). Patients who received placebo during induction continued to receive placebo throughout the maintenance study (PBO/PBO). Patients enrolled in GEMINI LTS received open-label vedolizumab (300 mg) every 4 weeks.

CD, Crohn's disease; CDAI, Crohn's Disease Activity Index; ITT, intent-to-treat; LTS, Long-Term Safety; OL, open-label; PBO, placebo; Q4W, every 4 weeks; Q8W, every 8 weeks; UC, ulcerative colitis; VDZ, vedolizumab.

<sup>a</sup>Clinical response at week 6 was defined as a reduction from baseline (week 0) in the Mayo Clinic score of  $\geq 3$  points and  $\geq 30\%$ , with an accompanying decrease of  $\geq 1$  point in the rectal bleeding subscore or an absolute rectal bleeding subscore of 0 or 1.

<sup>b</sup>Time from baseline (week 0) of the GEMINI LTS trial.

<sup>c</sup>Clinical response at week 6 was defined as a  $\geq 70$ -point decrease from baseline CDAI score.

<sup>d</sup>One patient completed study.

**Figure S2.**

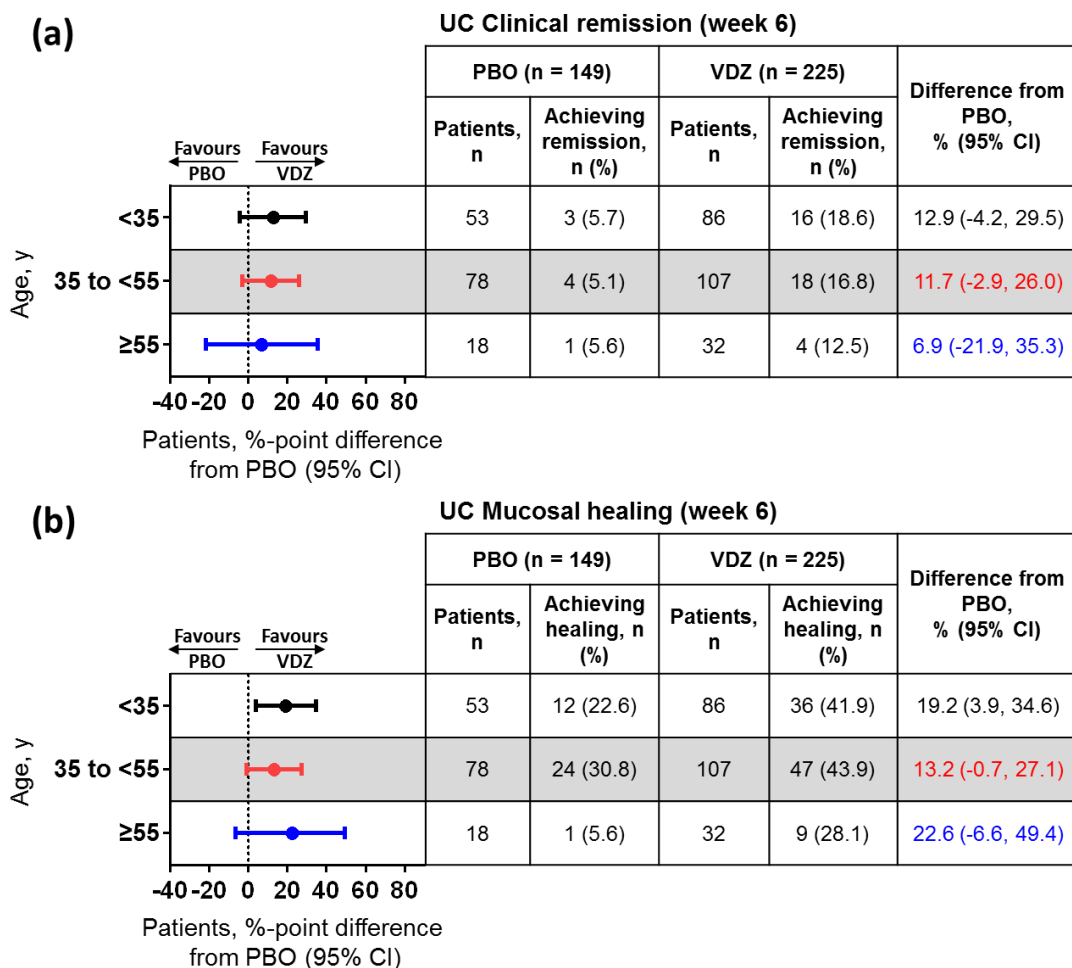

**Figure S2.** Secondary endpoints in the UC induction phase. **(A)** Clinical remission and **(B)** mucosal healing at week 6 in the induction ITT population

CI, confidence interval; ITT, intent-to-treat; PBO, placebo; UC, ulcerative colitis; VDZ, vedolizumab.

**Figure S3.**

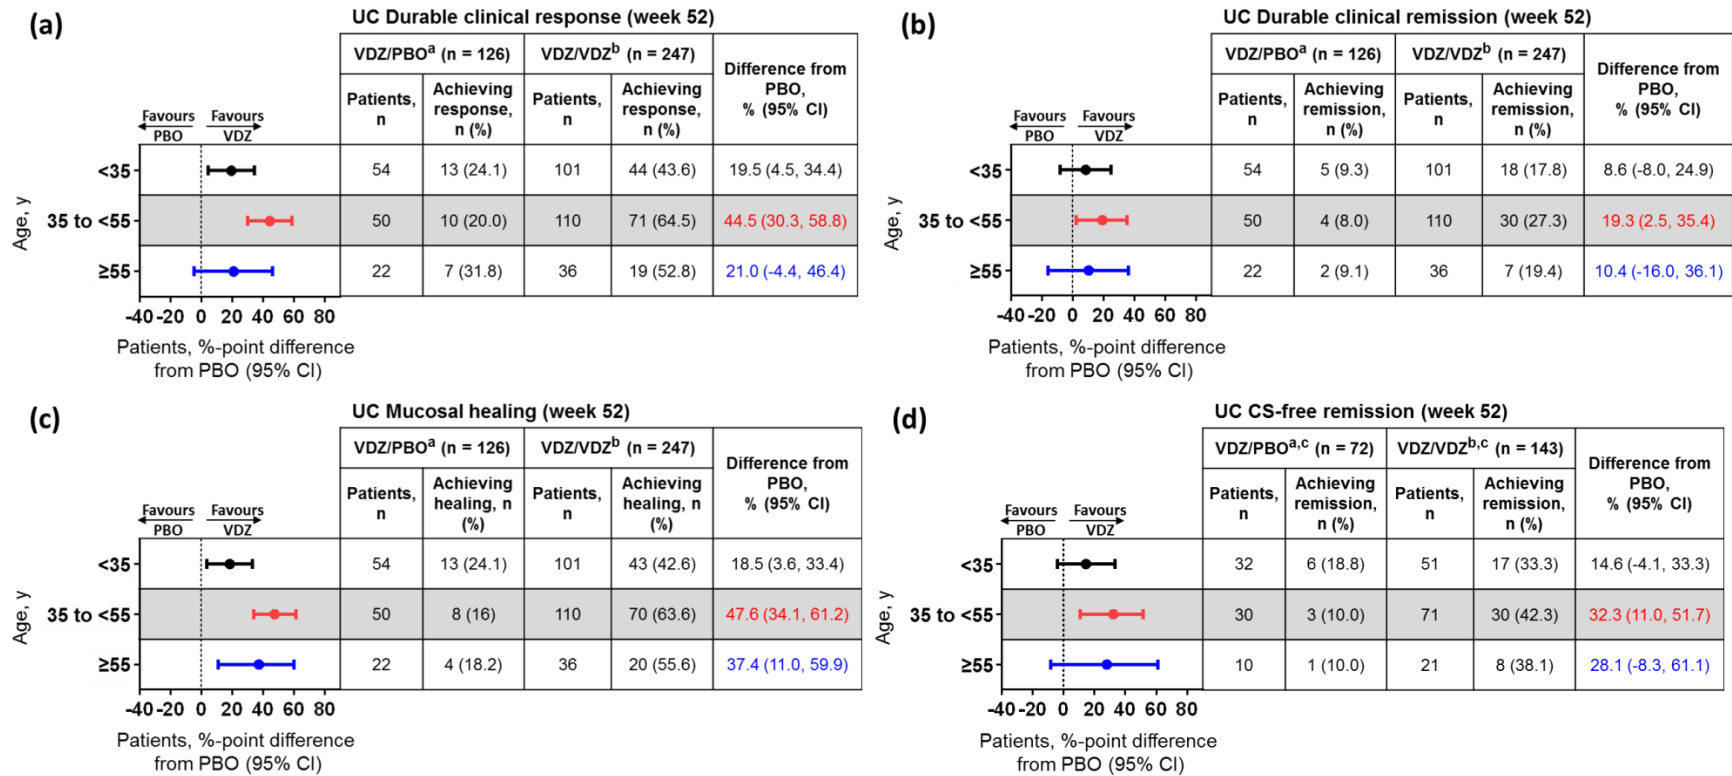

**Figure S3.** Secondary endpoints in the UC maintenance phase. **(A)** Durable clinical response, **(B)** durable clinical remission, **(C)** mucosal healing, and **(D)** corticosteroid-free remission at week 52 in the maintenance ITT population.

CI, confidence interval; CS, corticosteroid; ITT, intent-to-treat; PBO, placebo; UC, ulcerative colitis; VDZ, vedolizumab.

<sup>a</sup>Patients received VDZ during induction and PBO during maintenance.

Vedolizumab in patients with advancing age and UC or CD

<sup>b</sup>Patients received VDZ during induction and VDZ every 4 weeks or every 8 weeks during maintenance.

<sup>c</sup>Patients were receiving concomitant CS at study enrolment.

**Figure S4.**

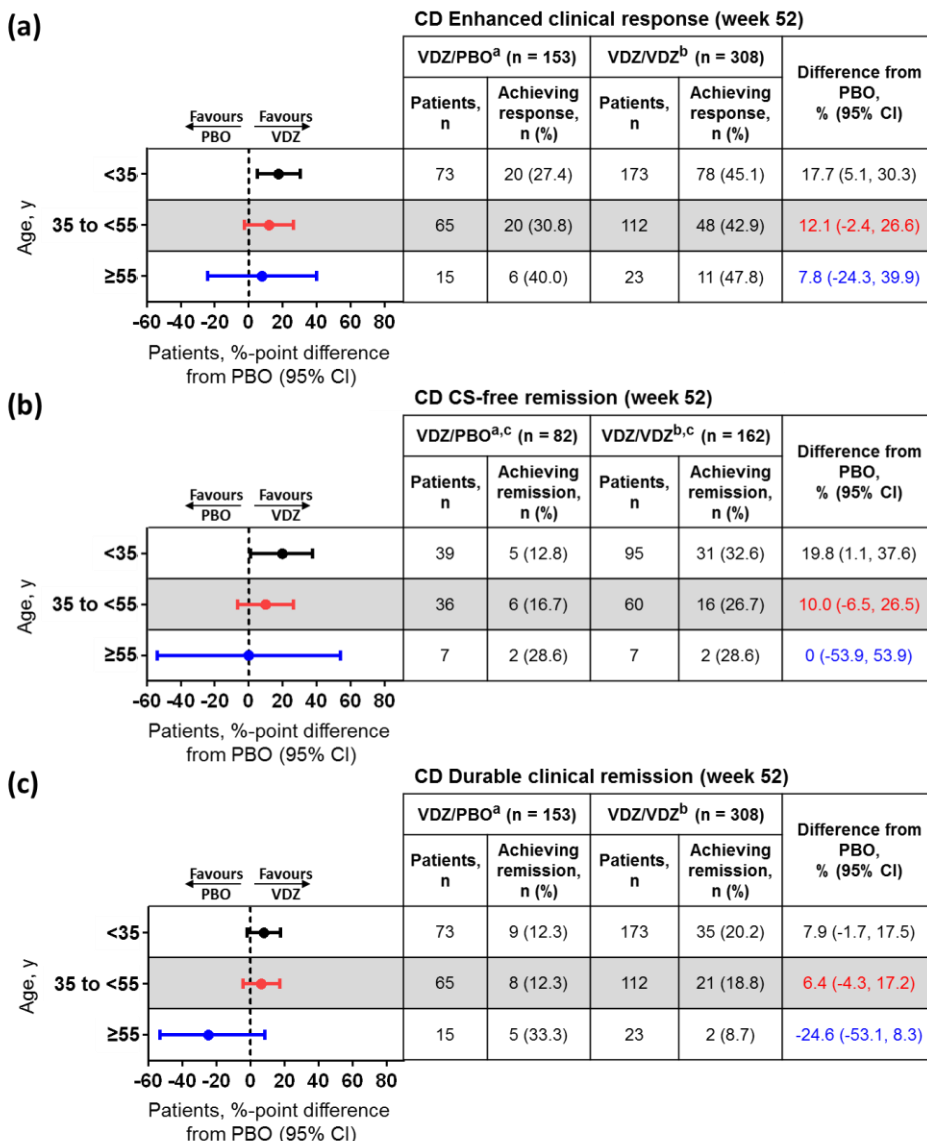

**Figure S4.** Secondary endpoints in the CD maintenance phase. **(A)** Enhanced clinical response, **(B)** corticosteroid-free remission, and **(C)** durable clinical remission at week 52 in the maintenance ITT population.

CD, Crohn’s disease; CI, confidence interval; CS, corticosteroid; ITT, intent-to-treat; PBO, placebo; VDZ, vedolizumab.

<sup>a</sup>Patients received VDZ during induction and PBO during maintenance.

Vedolizumab in patients with advancing age and UC or CD

<sup>b</sup>Patients received VDZ during induction and VDZ every 4 weeks or every 8 weeks during maintenance.

<sup>c</sup>Patients were receiving concomitant CS at study enrolment.
